# Supplementary material
Source: PubMed Central journal article supplement (PMC3895481)

Figure S1. ML tree of domestic dog (D) and wolf (W) mt genomes, constructed on the basis of the GTR+I model (logL = -45701.2). Numbers on branches are percentages of 1000 bootstrap samples supporting the branch; only values  $\geq 50\%$  are shown.

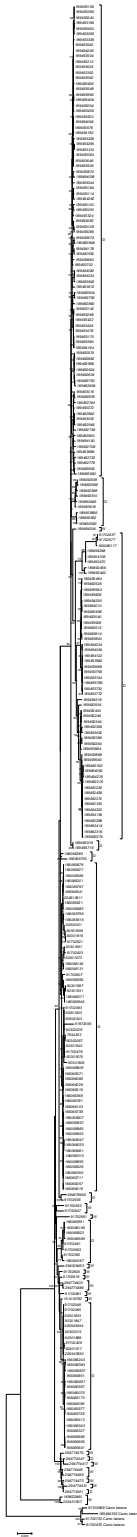

Figure S2. ML tree of domestic pig (D) and wild boar (W) mt genomes, constructed on the basis of the TN93+G+I model (logL = -41231.1). Numbers on branches are percentages of 1000 bootstrap samples supporting the branch; only values  $\geq 50\%$  are shown.

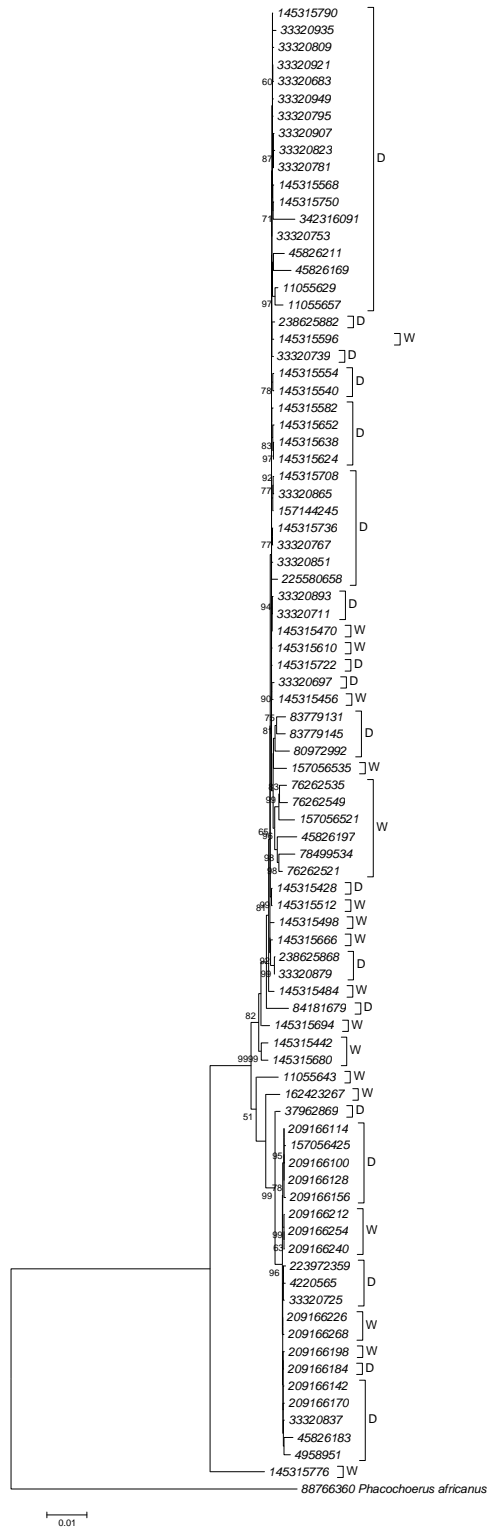

Figure S3. ML tree of domestic chicken (D) and red junglefowl (W) mt genomes, constructed on the basis of the HKY+G+I model (logL = -29453.3). Numbers on branches are percentages of 1000 bootstrap samples supporting the branch; only values  $\geq 50\%$  are shown.

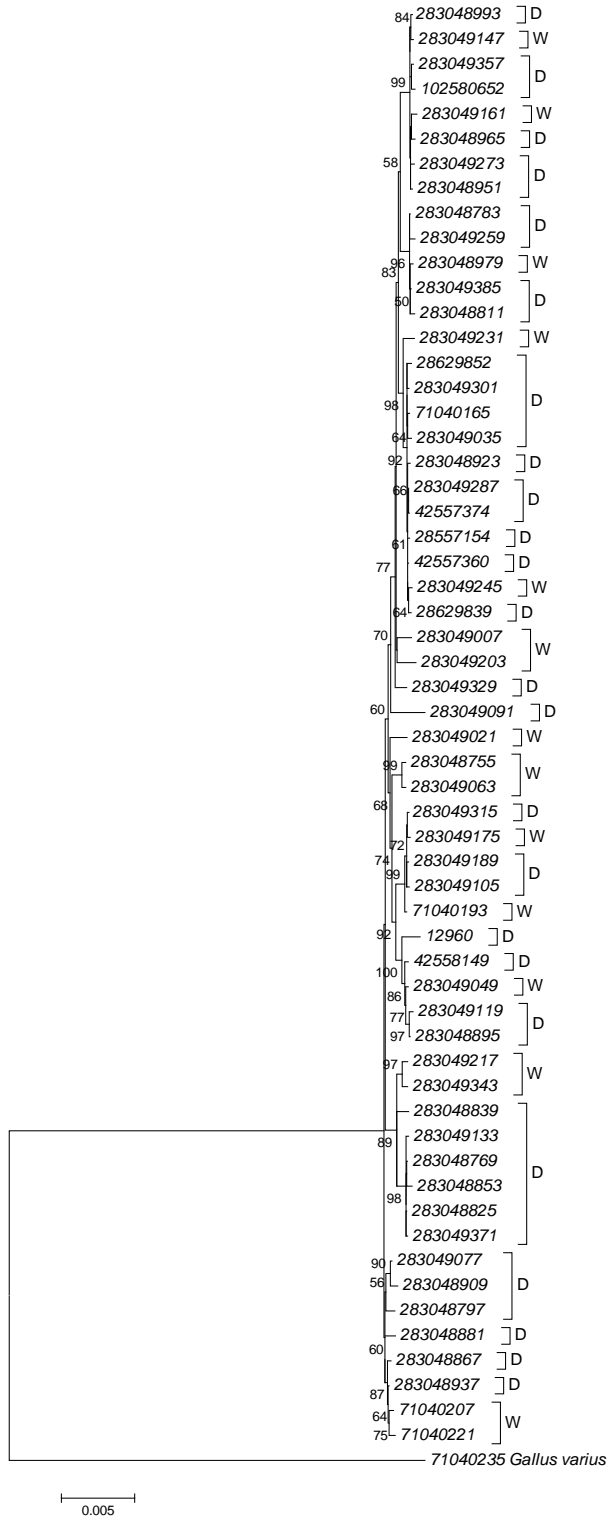

Figure S4. ML tree of domestic silkworm (*B. mori*) and wild silkworm (*B. mandarina*) mt genomes, constructed on the basis of the GTR+G+I model (logL = -45798.0). Numbers on branches are percentages of 1000 bootstrap samples supporting the branch; only values  $\geq 50\%$  are shown.

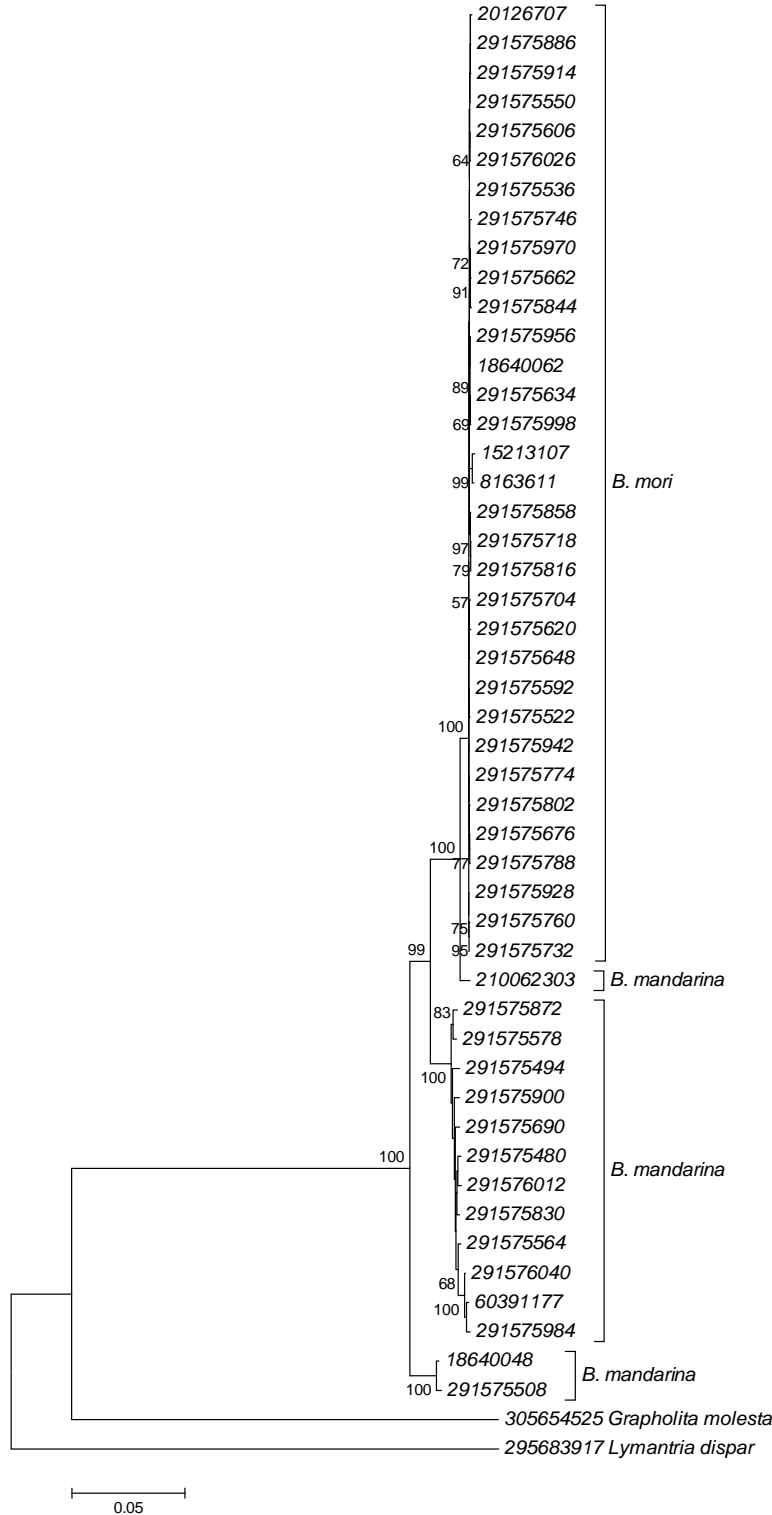

Supplement: NIHMS428074-supplement-01.pdf [file NIHMS428074-supplement-01.pdf]
